# Supplementary material
Source: publisher figshare collection journal article supplement (https://plos.figshare.com/articles/dataset/_/148088)
Supplement: Supplementary file [file 1]

## Protocol S2. Mathematical details of the Population Genetics Model

Using the symbols detailed in Table S3, the calculation of the spread of resistant phenotypes in the population was as follows.

$$R_n = G_{3,n} + G_{2,n}d$$

where

$$G_{g,n} = G_{g,n-1}P_{g,n-1} + (1 - L_{n-1})N_{g,n} \quad n > 0$$

$$g = 1 \rightarrow j = 1$$

$$g = 2 \rightarrow j = 1 + d$$

$$g = 3 \rightarrow j = 2$$

$$P_{g,n} = \sum_{i=1}^9 C_{g,n,i} S_{j,i}$$

$$L_n = \sum_{g=1}^3 P_{g,n} G_{g,n}$$

$$N_{g,n} = E_{g,n-l} \quad n > l$$

$$N_{g,n} = E_{g,1} \quad n \leq l$$

$$C_{g,n,1} = \frac{N_{g,n}(1-L_{n-1})}{N_{g,n}(1-L_{n-1}) + P_{g,n-1}} \quad n > 0$$

$$C_{g,n,i} = \frac{C_{g,n-1,i-1}S_{j,i-1}}{N_{g,n}(1-L_{n-1}) + P_{g,n-1}} \quad 1 < i \quad n > 0$$

$$E_{g,n} = \frac{B_{g,n}}{B_{1,n} + B_{2,n} + B_{3,n}}$$

$$B_{1,n} = \sum_{i=1}^{10} (F_{1,i}C_{1,n,i}G_{1,n} + 0.5F_{1+d,i}C_{2,n,i}G_{2,n})A_{1,n+1-i}$$

$$B_{2,n} = \sum_{i=1}^{10} F_{1,i}C_{1,n,i}G_{1,n}A_{2,n+1-i} + 0.5F_{1+d,i}C_{2,n,i}G_{2,n} + F_{2,i}C_{3,n,i}G_{3,n}A_{1,n+1-i}$$

$$B_{3,n} = \sum_{i=1}^{10} (F_{2,i}C_{3,n,i}G_{3,n} + 0.5F_{1+d,i}C_{2,n,i}G_{2,n})A_{2,n+1-i}$$

$$A_{1,n} = (0.5f_2N_{2,n} + f_1N_{1,n}) / (f_1N_{1,n} + f_2N_{2,n} + f_3N_{3,n})$$

$$A_{2,n} = (0.5f_2N_{2,n} + f_3N_{3,n}) / (f_1N_{1,n} + f_2N_{2,n} + f_3N_{3,n})$$

Efficacy of treatment is given as

$$T_n = 1 - M_n / u_s$$

where

$$M_n = \sum_{g=1}^3 \sum_{i=1}^{10} C_{g,n,i} I_{j,n,i} G_{g,n} .$$
